# Supplementary material for: Food authentication: truffle species classification by non-targeted lipidomics analyses using mass spectrometry assisted by ion mobility separation
Source: Royal Society of Chemistry journal article supplement (doi:10.1039/d2mo00088a), 2022-05-26
Supplement: d2mo00088a1.pdf [file d2mo00088a1.pdf]

## Electronic Supplementary Information

### **Food Authentication: Truffle Species Classification by non-targeted Lipidomics Analyzes using Mass Spectrometry assisted by Ion Mobility Separation**

Marina Creydt <sup>\*a</sup>, Markus Fischer <sup>a</sup>

<sup>a</sup>Hamburg School of Food Science – Institute of Food Chemistry, University of Hamburg, Grindelallee 117, 20146 Hamburg, Germany

\*Corresponding author:

Marina Creydt, [marina.creydt@uni-hamburg.de](mailto:marina.creydt@uni-hamburg.de)

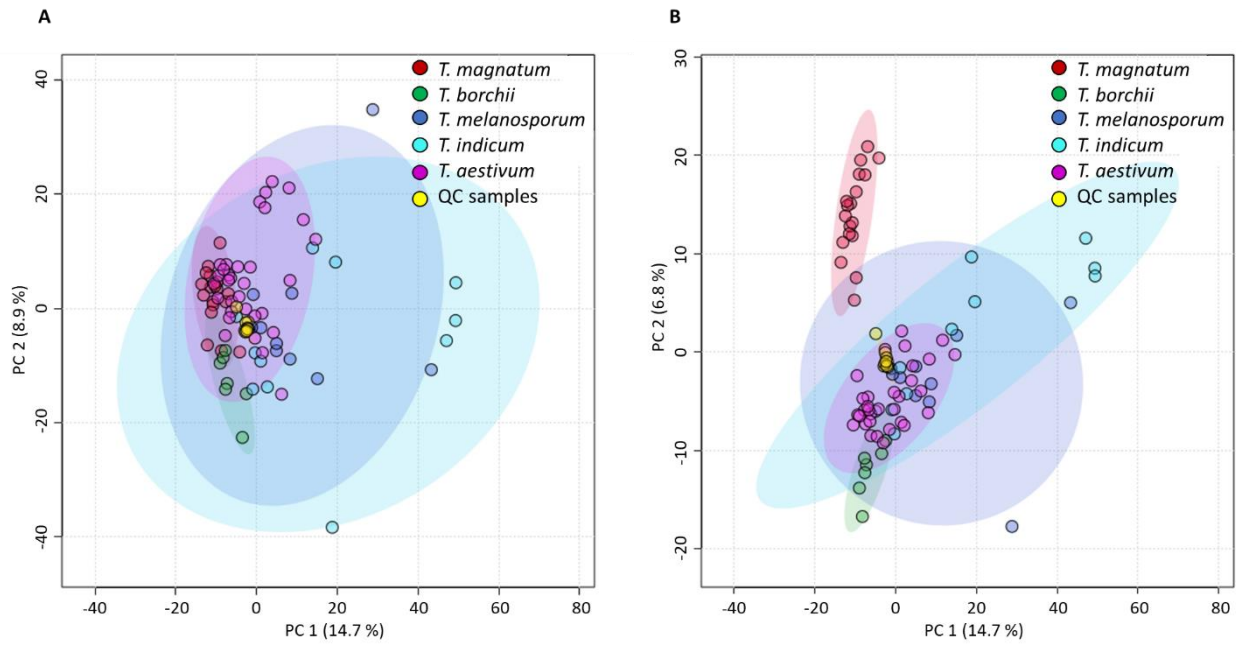

**Figure S1.** PCA scores plot of all measurements including QC samples. A) PC 1 vs. PC 2 and B) PC 1 vs. PC 3).

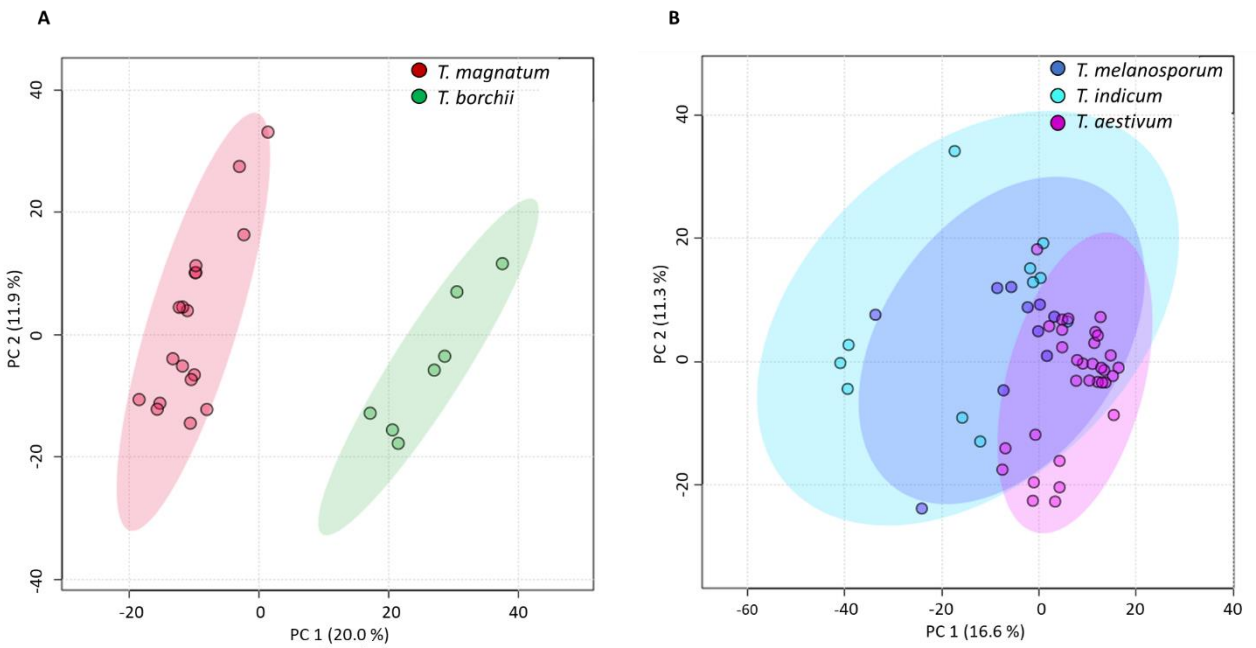

**Figure S2.** PCA scores plot of all detected features. A) White truffle varieties. B) Black truffle varieties.

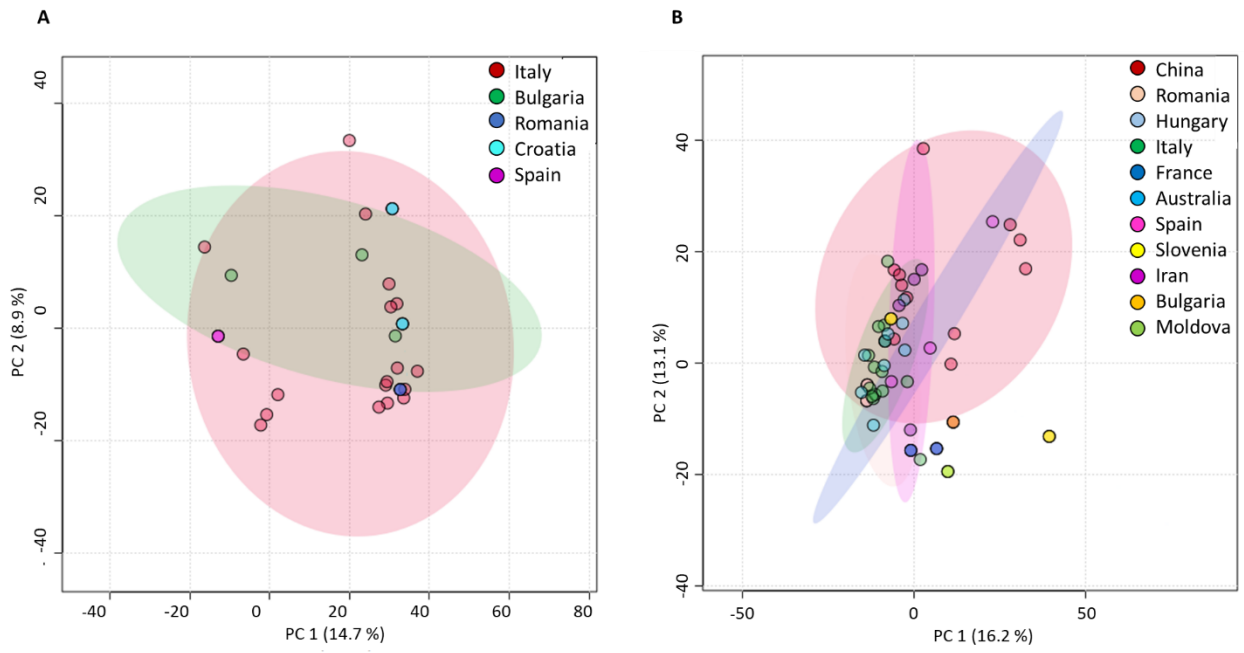

**Figure S3.** PCA scores plot of all detected features. A) White truffle varieties colored according to their geographical origin. B) Black truffle varieties colored according to their geographical origin.

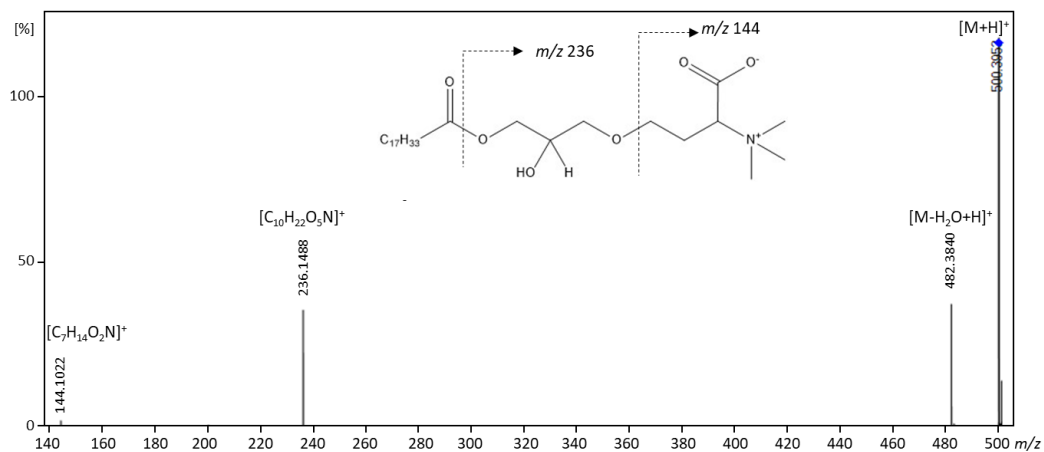

Figure S4. MS/MS spectrum of LDGTS (18:1).

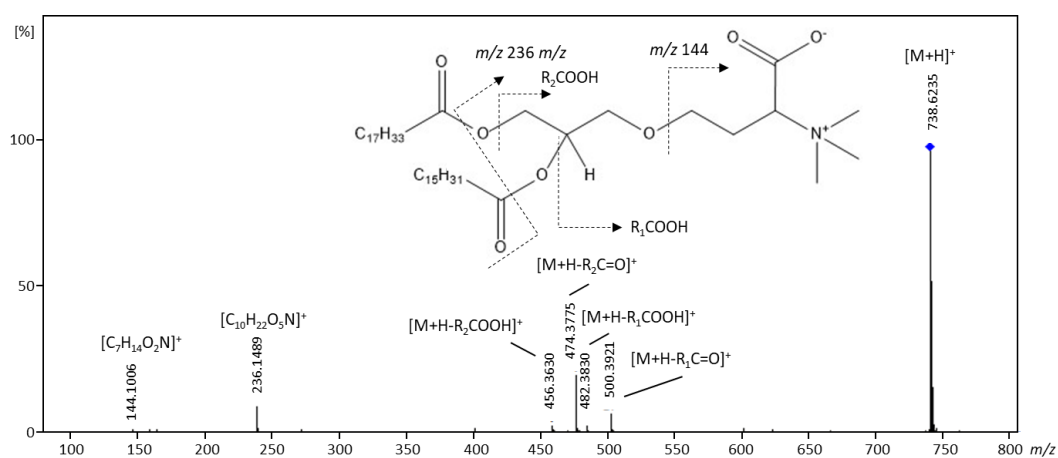

Figure S5. MS/MS spectrum of DGTS (34:1).

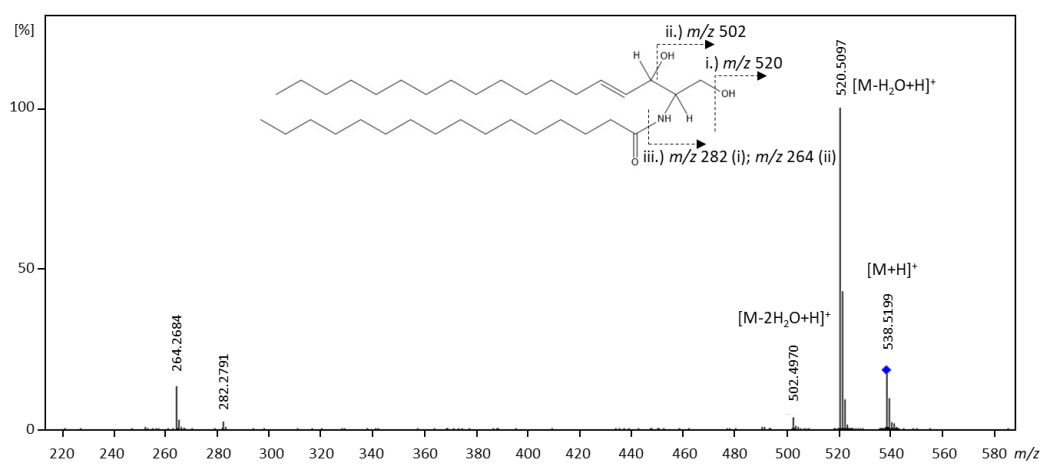

Figure S6. MS/MS spectrum of Cer (34:1;O2)

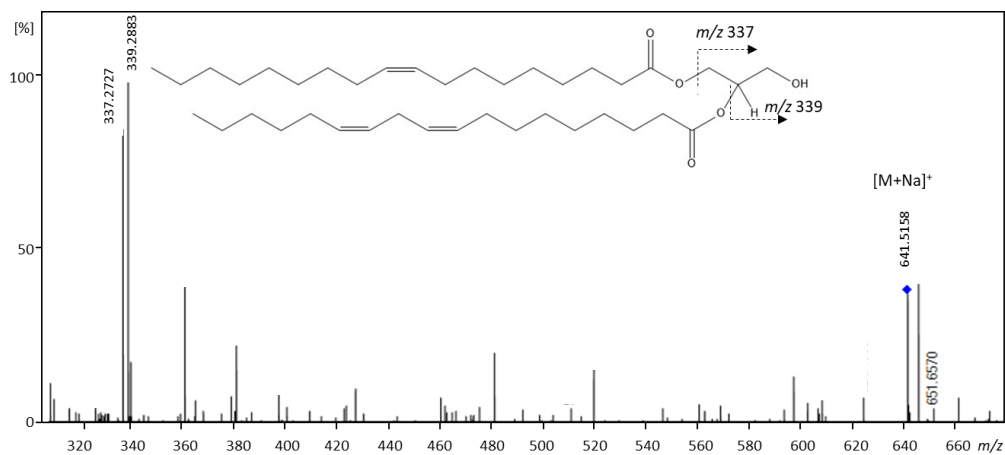

**Figure S7.** MS/MS spectrum of DG (36:3).

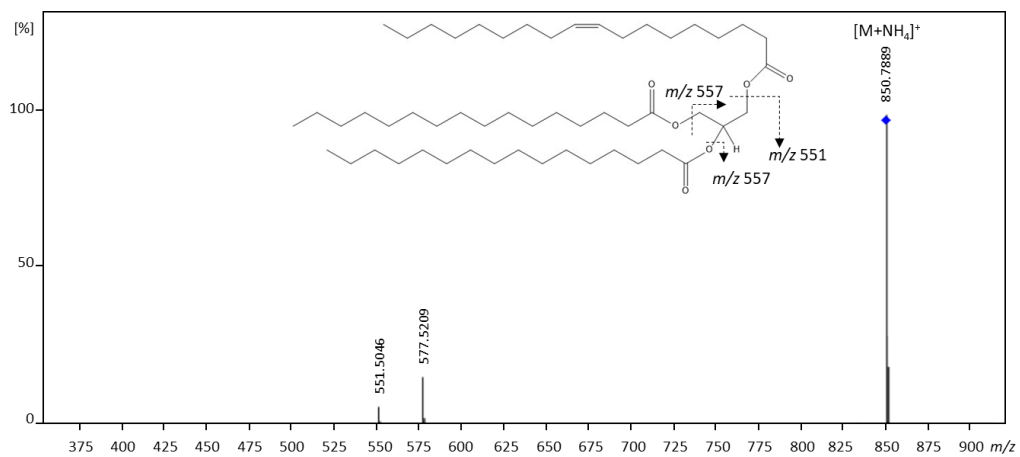

**Figure S8.** MS/MS spectrum of TG (50:1)

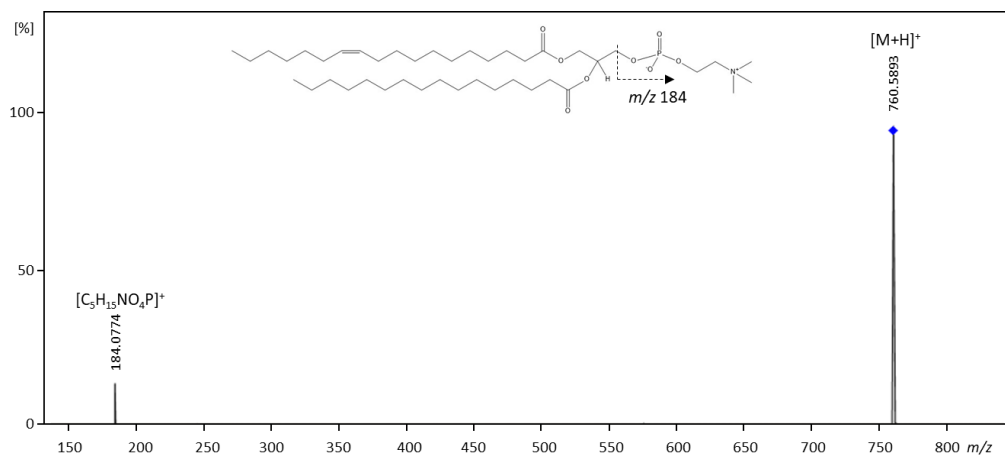

**Figure S9.** MS/MS spectrum of PC (34:1).

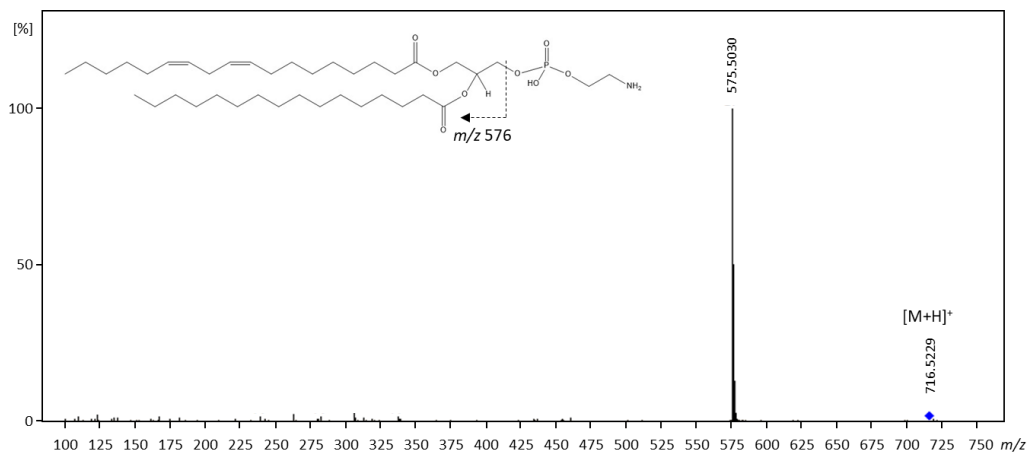

Figure S10. MS/MS spectrum of PE (34:2).

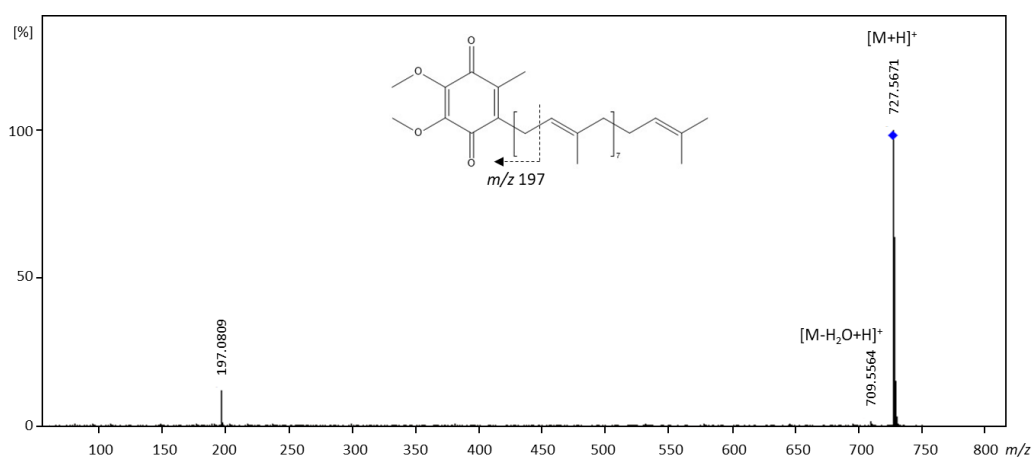

Figure S11. MS/MS spectrum of Coenzyme Q8.

**Table S1.** Identified key metabolites of the white truffle samples with their LC-IM-MS data, which show a dependency due to different origins.

| Tentative compound              | Proposed formula                                  | RT [min] | Adduct                            | m/z calculated [Da] | m/z measured [Da] | Error [ppm] | Relevant fragments             | Match Score Total (Lipid Annotator) | CCS value measured [Å <sup>2</sup> ] | CCS value calculated [Å <sup>2</sup> ] | Delta CCS [%] | FDR     |
|---------------------------------|---------------------------------------------------|----------|-----------------------------------|---------------------|-------------------|-------------|--------------------------------|-------------------------------------|--------------------------------------|----------------------------------------|---------------|---------|
| <b>Betaine diradylglycerols</b> |                                                   |          |                                   |                     |                   |             |                                |                                     |                                      |                                        |               |         |
| LDGTS (18:1)                    | C <sub>28</sub> H <sub>53</sub> NO <sub>6</sub>   | 4.5      | [M+H] <sup>+</sup>                | 500.3946            | 500.3953          | 1.47        | 482.38; 236.15; 144.10         | 90.14                               | 228.6                                | no entry                               | no entry      | 2.4E-7  |
| LDGTS (18:2)                    | C <sub>28</sub> H <sub>51</sub> NO <sub>6</sub>   | 4.2      | [M+H] <sup>+</sup>                | 498.3789            | 498.3788          | -0.23       | 480.37; 236.15; 144.10         | 95.41                               | 224.5                                | no entry                               | no entry      | 2.9E-9  |
| DGTS (34:1)                     | C <sub>44</sub> H <sub>83</sub> NO <sub>7</sub>   | 9.3      | [M+H] <sup>+</sup>                | 738.6242            | 738.6245          | 0.37        | 474.38; 236.15; 144.10         | 75.27                               | 286.4                                | no entry                               | no entry      | 5.0E-21 |
| DGTS (34:2)                     | C <sub>44</sub> H <sub>81</sub> NO <sub>7</sub>   | 8.5      | [M+H] <sup>+</sup>                | 736.6086            | 736.6081          | -0.65       | 236.15                         | 75.09                               | 283.6                                | no entry                               | no entry      | 3.5E-18 |
| DGTS (36:2)                     | C <sub>46</sub> H <sub>85</sub> NO <sub>7</sub>   | 9.4      | [M+H] <sup>+</sup>                | 764.6399            | 764.6392          | -0.89       | 500.40; 236.15; 144.10         | 74.71                               | 291.2                                | no entry                               | no entry      | 9.3E-10 |
| DGTS (36:3)                     | C <sub>46</sub> H <sub>83</sub> NO <sub>7</sub>   | 8.6      | [M+H] <sup>+</sup>                | 762.6242            | 762.6245          | 0.35        | 500.40; 482.38; 236.15; 144.10 | 74.85                               | 288.7                                | no entry                               | no entry      | 2.6E-15 |
| DGTS (36:4)                     | C <sub>46</sub> H <sub>81</sub> NO <sub>7</sub>   | 7.7      | [M+H] <sup>+</sup>                | 760.6086            | 760.6103          | 2.26        | 498.38; 480.37; 236.15; 144.10 | 75.06                               | 285.9                                | no entry                               | no entry      | 8.3E-15 |
| <b>Ceramides</b>                |                                                   |          |                                   |                     |                   |             |                                |                                     |                                      |                                        |               |         |
| Cer (34:0;O3)                   | C <sub>34</sub> H <sub>69</sub> NO <sub>4</sub>   | 9.5      | [M+H] <sup>+</sup>                | 556.5299            | 556.5322          | 4.08        | 538.52; 520.50                 | /                                   | 257.5                                | 259.6                                  | 0.8           | 5.1E-6  |
| Cer (36:3;O3)                   | C <sub>36</sub> H <sub>67</sub> NO <sub>4</sub>   | 9.6      | [M+H] <sup>+</sup>                | 578.5143            | 578.5142          | -0.15       | 560.50                         | /                                   | 256.5                                | no entry                               | no entry      | 6.3E-7  |
| HexCer (35:3;O2)                | C <sub>41</sub> H <sub>75</sub> NO <sub>8</sub>   | 7.6      | [M+H] <sup>+</sup>                | 710.5565            | 710.5564          | -0.20       | 548.50; 530.49                 | 86.50                               | 278.3                                | no entry                               | no entry      | 6.2E-6  |
| <b>Glycerolipids</b>            |                                                   |          |                                   |                     |                   |             |                                |                                     |                                      |                                        |               |         |
| DG (36:3)                       | C <sub>39</sub> H <sub>70</sub> O <sub>5</sub>    | 10.4     | [M+H] <sup>+</sup>                | 619.5296            | 619.5285          | 1.78        | 337.27                         | /                                   | 261.8                                | 262.3                                  | 0.2           | 1.1E-6  |
| DG (36:3)                       | C <sub>39</sub> H <sub>70</sub> O <sub>5</sub>    | 10.4     | [M+NH <sub>4</sub> ] <sup>+</sup> | 636.5562            | 636.5561          | -0.08       | 339.29; 337.27                 | 88.10                               | 261.4                                | 263.6                                  | 0.8           | 3.2E-7  |
| DG (36:3)                       | C <sub>39</sub> H <sub>70</sub> O <sub>5</sub>    | 10.5     | [M+Na] <sup>+</sup>               | 641.5115            | 641.5119          | 0.57        | 339.29; 337.27                 | /                                   | 261.8                                | 264.0                                  | 0.8           | 2.9E-6  |
| TG (50:1)                       | C <sub>53</sub> H <sub>100</sub> O <sub>6</sub>   | 18.6     | [M+NH <sub>4</sub> ] <sup>+</sup> | 850.7858            | 850.7889          | 3.7         | 577.52; 551.50                 | 90.19                               | 317.1                                | 315.7                                  | -0.4          | 5.1E-10 |
| TG (50:1)                       | C <sub>53</sub> H <sub>100</sub> O <sub>6</sub>   | 18.6     | [M+Na] <sup>+</sup>               | 855.7412            | 855.7410          | -0.25       | /                              | 78.44                               | 315.4                                | 316.1                                  | 0.2           | 6.8E-9  |
| TG (50:2)                       | C <sub>53</sub> H <sub>98</sub> O <sub>6</sub>    | 17.9     | [M+NH <sub>4</sub> ] <sup>+</sup> | 848.7702            | 848.7707          | 0.64        | 577.52; 575.50; 549.49         | 88.45                               | 315.0                                | 313.4                                  | -0.5          | 1.2E-10 |
| TG (50:2)                       | C <sub>53</sub> H <sub>98</sub> O <sub>6</sub>    | 17.9     | [M+Na] <sup>+</sup>               | 853.7256            | 853.7259          | 0.41        | /                              | 79.87                               | 314.1                                | 313.8                                  | -0.1          | 4.5E-9  |
| TG (52:2)                       | C <sub>55</sub> H <sub>102</sub> O <sub>6</sub>   | 18.6     | [M+NH <sub>4</sub> ] <sup>+</sup> | 876.8015            | 876.8055          | 4.7         | 603.53; 577.52                 | 87.96                               | 322.0                                | 319.3                                  | -0.8          | 2.9E-6  |
| TG (52:2)                       | C <sub>55</sub> H <sub>102</sub> O <sub>6</sub>   | 18.7     | [M+Na] <sup>+</sup>               | 881.7569            | 881.7547          | -2.52       | 577.52                         | 78.42                               | 321.1                                | 319.6                                  | -0.5          | 1.1E-6  |
| TG (54:1)                       | C <sub>57</sub> H <sub>108</sub> O <sub>6</sub>   | 19.3     | [M+Na] <sup>+</sup>               | 911.8038            | 911.8038          | -0.01       | 607.56; 605.55                 | 75.82                               | 327.6                                | 327.3                                  | -0.1          | 3.0E-7  |
| TG (54:2)                       | C <sub>57</sub> H <sub>106</sub> O <sub>6</sub>   | 20.0     | [M+NH <sub>4</sub> ] <sup>+</sup> | 904.8328            | 904.8360          | 3.65        | 605.55; 603.54                 | 90.54                               | 327.9                                | 325.1                                  | -0.9          | 2.9E-6  |
| TG (54:3)                       | C <sub>57</sub> H <sub>104</sub> O <sub>6</sub>   | 19.2     | [M+NH <sub>4</sub> ] <sup>+</sup> | 902.8171            | 902.8193          | 2.47        | 605.55; 603.54; 601.52         | 87.73                               | 326.4                                | 324.1                                  | -0.7          | 2.1E-7  |
| TG (57:4)                       | C <sub>60</sub> H <sub>108</sub> O <sub>6</sub>   | 19.2     | [M+Na] <sup>+</sup>               | 947.8038            | 947.8043          | 0.53        | 645.58; 599.50                 | 69.05                               | 330.3                                | 331.8                                  | -0.5          | 1.2E-5  |
| <b>Phospholipids</b>            |                                                   |          |                                   |                     |                   |             |                                |                                     |                                      |                                        |               |         |
| PC (32:1)                       | C <sub>40</sub> H <sub>78</sub> NO <sub>8</sub> P | 8.0      | [M+H] <sup>+</sup>                | 732.5538            | 732.5567          | 3.99        | 184.07                         | 92.58                               | 281.3                                | 281.9                                  | 0.2           | 1.5E-6  |
| PC (34:1)                       | C <sub>42</sub> H <sub>82</sub> NO <sub>8</sub> P | 9.2      | [M+H] <sup>+</sup>                | 760.5851            | 760.5893          | 5.55        | 184.07                         | 96.67                               | 287.1                                | 288.1-288.2                            | 0.4           | 1.2E-17 |
| PC (34:2)                       | C <sub>42</sub> H <sub>80</sub> NO <sub>8</sub> P | 8.3      | [M+H] <sup>+</sup>                | 758.5694            | 758.5707          | 1.67        | 184.07                         | 94.00                               | 284.6                                | 281.4-287.6                            | -1.1-1.03     | 3.1E-7  |
| PC (35:2)                       | C <sub>43</sub> H <sub>82</sub> NO <sub>8</sub> P | 8.5      | [M+H] <sup>+</sup>                | 772.5851            | 772.5847          | -0.49       | 184.07                         | 85.18                               | 287.9                                | 287.9-289.1                            | 0.0-0.4       | 9.1E-7  |
| PC (35:4)                       | C <sub>43</sub> H <sub>78</sub> NO <sub>8</sub> P | 7.3      | [M+H] <sup>+</sup>                | 768.5538            | 768.5529          | -1.15       | 184.07                         | 97.33                               | 283.5                                | 284.2-286.3                            | 0.3-1.0       | 6.5E-6  |
| PC (35:6)                       | C <sub>43</sub> H <sub>74</sub> NO <sub>8</sub> P | 8.5      | [M+H] <sup>+</sup>                | 764.5225            | 764.5206          | -2.46       | 184.07                         | /                                   | 282.0                                | 281.2-282.0                            | -0.3-0.0      | 1.5E-7  |
| PC (36:5)                       | C <sub>44</sub> H <sub>78</sub> NO <sub>8</sub> P | 8.1      | [M+H] <sup>+</sup>                | 780.5538            | 780.5507          | -3.95       | 184.07                         | 86.41                               | 288.0                                | 286.2-288.4                            | -0.6-0.1      | 1.1E-5  |
| PC (37:4)                       | C <sub>45</sub> H <sub>82</sub> NO <sub>8</sub> P | 8.0      | [M+H] <sup>+</sup>                | 796.5851            | 796.5841          | -1.23       | 184.07                         | 87.55                               | 290.8                                | 290.7-292.8                            | 0.0-0.6       | 8.9E-7  |

**Table S1.** Continued.

| Tentative compound   | Proposed formula                                  | RT [min] | Adduct              | m/z calculated [Da] | m/z measured [Da] | Error [ppm] | Relevant fragments | Match Score Total (Lipid Annotator) | CCS value measured [Å <sup>2</sup> ] | CCS value calculated [Å <sup>2</sup> ] | Delta CCS [%] | FDR    |
|----------------------|---------------------------------------------------|----------|---------------------|---------------------|-------------------|-------------|--------------------|-------------------------------------|--------------------------------------|----------------------------------------|---------------|--------|
| PC (37:5)            | C <sub>45</sub> H <sub>80</sub> NO <sub>8</sub> P | 8.7      | [M+H] <sup>+</sup>  | 794.5694            | 794.5656          | -4.83       | 184.07             | 65.20                               | 291.4                                | 289.8-291.1                            | -0.5-0.0      | 7.9E-7 |
| PC (38:4)            | C <sub>46</sub> H <sub>84</sub> NO <sub>8</sub> P | 8.4      | [M+H] <sup>+</sup>  | 810.6007            | 810.5999          | -1.03       | 184.07             | 97.67                               | 292.4                                | 285.5-296.4                            | -2.4-1.3      | 1.2E-7 |
| PC (40:7)            | C <sub>48</sub> H <sub>82</sub> NO <sub>8</sub> P | 8.5      | [M+H] <sup>+</sup>  | 832.5851            | 832.5818          | -3.95       | 184.07             | /                                   | 294.9                                | 295.4-296.8                            | 0.2-0.6       | 1.0E-7 |
| PE (34:2)            | C <sub>39</sub> H <sub>74</sub> NO <sub>8</sub> P | 8.2      | [M+H] <sup>+</sup>  | 716.5225            | 716.5229          | 0.59        | 575.50             | 85.94                               | 273.1                                | 273.2-275.5                            | 0.0-0.9       | 3.2E-7 |
| PE (36:3)            | C <sub>41</sub> H <sub>76</sub> NO <sub>8</sub> P | 8.3      | [M+H] <sup>+</sup>  | 742.5381            | 742.5382          | 0.09        | 601.52             | 80.53                               | 276.4                                | 278.1-280.2                            | 0.6-1.4       | 1.7E-6 |
| <b>Other</b>         |                                                   |          |                     |                     |                   |             |                    |                                     |                                      |                                        |               |        |
| Coenzyme Q8          | C <sub>49</sub> H <sub>74</sub> O <sub>4</sub>    | 12.4     | [M+Na] <sup>+</sup> | 749.5479            | 749.5480          | 0.09        | /                  | /                                   | 276.2                                | 277.5                                  | 0.5           | 6.5E-6 |
| Ergosteryl glucoside | C <sub>34</sub> H <sub>54</sub> O <sub>6</sub>    | 5.9      | [M+Na] <sup>+</sup> | 581.3813            | 581.3817          | 0.79        | 203.05             | /                                   | 262.6                                | no entry                               | no entry      | 2.4E-6 |

Abbreviations: Cer, ceramide; DG, diacylglycerol; DGTS, diacylglycerol-O-4'-(N,N,N-trimethyl) homoserine; FDR, false discovery rate; LDGTS, lyso-diacylglycerol-O-4'-(N,N,N-trimethyl) homoserine; PC, glycerophosphocholine; PE, glycerophosphoethanolamine; TG, triacylglycerol.

Some compounds could not be assigned automatically using the Lipid Annotator software from Agilent because they were not present in the databases or because MS/MS spectra could not be acquired in all-ion fragmentation mode. In such cases, the software cannot carry out any evaluation. These spectra were recorded in targeted MS/MS mode and evaluated manually, which is why no match scores were given.



**Table S2.** Identified key metabolites of the black truffle samples with their LC-IM-MS data, which show a dependency due to different origins.

| Tentative compound              | Proposed formula                                   | RT [min] | Adduct                              | m/z calculated [Da] | m/z measured [Da] | Error [ppm] | Relevant fragments             | Match Score Total (Lipid Annotator) | CCS value measured [Å <sup>2</sup> ] | CCS value calculated [Å <sup>2</sup> ] | Delta CCS [%] | FDR     |
|---------------------------------|----------------------------------------------------|----------|-------------------------------------|---------------------|-------------------|-------------|--------------------------------|-------------------------------------|--------------------------------------|----------------------------------------|---------------|---------|
| <b>Betaine diradylglycerols</b> |                                                    |          |                                     |                     |                   |             |                                |                                     |                                      |                                        |               |         |
| DGTS (34:1)                     | C <sub>44</sub> H <sub>83</sub> NO <sub>7</sub>    | 9.5      | [M+H] <sup>+</sup>                  | 738.6242            | 738.6233          | -1.26       | 236.15                         | 75.27                               | 286.2                                | no entry                               | no entry      | 5.5E-13 |
| DGTS (34:2)                     | C <sub>44</sub> H <sub>81</sub> NO <sub>7</sub>    | 8.7      | [M+H] <sup>+</sup>                  | 736.6086            | 736.6101          | 2.07        | 263.15; 144.10                 | 75.09                               | 283.7                                | no entry                               | no entry      | 1.4E-15 |
| DGTS (36:1)                     | C <sub>46</sub> H <sub>87</sub> NO <sub>7</sub>    | 10.4     | [M+H] <sup>+</sup>                  | 766.6555            | 766.6579          | 3.09        | 236.15; 144.10                 | 73.59                               | 292.8                                | no entry                               | no entry      | 7.1E-7  |
| DGTS (36:2)                     | C <sub>46</sub> H <sub>85</sub> NO <sub>7</sub>    | 9.4      | [M+H] <sup>+</sup>                  | 764.6399            | 764.6417          | 2.38        | 236.15; 144.10                 | 74.71                               | 291.2                                | no entry                               | no entry      | 3.2E-7  |
| DGTS (36:3)                     | C <sub>46</sub> H <sub>83</sub> NO <sub>7</sub>    | 8.5      | [M+H] <sup>+</sup>                  | 762.6242            | 762.6263          | 2.72        | 500.40; 236.15; 144.10         | 74.85                               | 288.6                                | no entry                               | no entry      | 5.2E-8  |
| DGTS (36:4) I                   | C <sub>46</sub> H <sub>81</sub> NO <sub>7</sub>    | 8.0      | [M+H] <sup>+</sup>                  | 760.6086            | 760.6108          | 2.92        | 498.38; 480.37; 236.15; 144.10 | 75.06                               | 286.6                                | no entry                               | no entry      | 4.0E-7  |
| DGTS (36:4) II                  | C <sub>46</sub> H <sub>81</sub> NO <sub>7</sub>    | 9.3      | [M+H] <sup>+</sup>                  | 760.6086            | 760.6082          | -0.50       | 236.15                         | /                                   | 287.5                                | no entry                               | no entry      | 1.3E-17 |
| <b>Ceramides</b>                |                                                    |          |                                     |                     |                   |             |                                |                                     |                                      |                                        |               |         |
| Cer (34:1;O2)                   | C <sub>34</sub> H <sub>67</sub> NO <sub>3</sub>    | 9.3      | [M-H <sub>2</sub> O+H] <sup>+</sup> | 520.5088            | 520.5070          | -3.48       | 502.49; 264.27                 | /                                   | 252.5                                | no entry                               | no entry      | 2.5E-11 |
| Cer (34:1;O2)                   | C <sub>34</sub> H <sub>67</sub> NO <sub>3</sub>    | 9.4      | [M+H] <sup>+</sup>                  | 538.5194            | 538.5199          | 0.98        | 520.50; 502.50; 282.28; 264.27 | /                                   | 254.1                                | 256.2                                  | 0.8           | 4.0E-10 |
| Cer (34:2;O2)                   | C <sub>34</sub> H <sub>65</sub> NO <sub>3</sub>    | 8.9      | [M+H] <sup>+</sup>                  | 536.5037            | 536.5040          | 0.52        | 518.50; 282.28; 264.27         | /                                   | 255.7                                | 248.9-252.2                            | -2.7-1.4      | 2.2E-8  |
| Cer (34:2;O2)                   | C <sub>34</sub> H <sub>65</sub> NO <sub>3</sub>    | 8.8      | [M+Na] <sup>+</sup>                 | 558.4857            | 558.4884          | 5.11        | 540.53; 264.27                 | /                                   | 248.7                                | 250.7-253.9                            | 0.8-2.1       | 3.9E-9  |
| Cer (34:3;O)                    | C <sub>34</sub> H <sub>63</sub> NO <sub>2</sub>    | 8.9      | [M+H] <sup>+</sup>                  | 518.4932            | 518.4927          | -0.88       | /                              | /                                   | 250.1                                | no entry                               | no entry      | 8.6E-9  |
| <b>Phospholipids</b>            |                                                    |          |                                     |                     |                   |             |                                |                                     |                                      |                                        |               |         |
| PC (34:2)                       | C <sub>42</sub> H <sub>80</sub> NO <sub>8</sub> P  | 8.3      | [M+H] <sup>+</sup>                  | 758.5694            | 758.5717          | 2.99        | 184.07                         | 94.00                               | 284.6                                | 281.4-287.6                            | -1.1-1.0      | 1.9E-16 |
| PC (36:1)                       | C <sub>44</sub> H <sub>86</sub> NO <sub>8</sub> P  | 10.1     | [M+H] <sup>+</sup>                  | 788.6164            | 788.6192          | 3.58        | 184.07                         | 91.24                               | 293.8                                | 294.2-294.6                            | 0.1-0.3       | 5.5E-7  |
| PC (36:2)                       | C <sub>44</sub> H <sub>84</sub> NO <sub>8</sub> P  | 9.3      | [M+H] <sup>+</sup>                  | 786.6007            | 786.6020          | 1.61        | 184.07                         | 95.39                               | 291.2                                | 291.4-296.2                            | 0.1-1.7       | 1.4E-9  |
| PC (36:3)                       | C <sub>44</sub> H <sub>82</sub> NO <sub>8</sub> P  | 8.4      | [M+H] <sup>+</sup>                  | 784.5851            | 784.5872          | 2.70        | 184.07                         | 97.86                               | 289.1                                | 289.8-291.7                            | 0.2-0.9       | 2.6E-9  |
| PE (37:7)                       | C <sub>42</sub> H <sub>70</sub> NO <sub>8</sub> P  | 13.0     | [M+NH <sub>4</sub> ] <sup>+</sup>   | 765.5177            | 765.5190          | 1.70        | /                              | /                                   | 277.7                                | 274.1-274.8                            | -1.2-1.0      | 8.9E-19 |
| PE (39:8)                       | C <sub>44</sub> H <sub>72</sub> NO <sub>8</sub> P  | 8.3      | [M+H] <sup>+</sup>                  | 774.5068            | 774.5064          | -0.56       | /                              | /                                   | 281.1                                | 278.1                                  | -1.1          | 1.2E-6  |
| PE (O-37:2)                     | C <sub>42</sub> H <sub>82</sub> NO <sub>7</sub> P  | 13.0     | [M+H] <sup>+</sup>                  | 744.5902            | 744.5938          | 4.80        | /                              | /                                   | 278.8                                | 282.1                                  | 1.2           | 1.4E-12 |
| PG (41:2)                       | C <sub>47</sub> H <sub>89</sub> O <sub>10</sub> P  | 12.3     | [M+H] <sup>+</sup>                  | 845.6266            | 845.6229          | -4.39       | /                              | /                                   | 326.5                                | no entry                               | no entry      | 2.7E-12 |
| PS (38:2)                       | C <sub>44</sub> H <sub>82</sub> NO <sub>10</sub> P | 10.5     | [M+NH <sub>4</sub> ] <sup>+</sup>   | 833.6015            | 833.6060          | 5.57        | /                              | /                                   | 290.8                                | 291.7-292.9                            | 0.3-0.7       | 8.6E-9  |
| <b>Other</b>                    |                                                    |          |                                     |                     |                   |             |                                |                                     |                                      |                                        |               |         |
| Coenzyme Q8                     | C <sub>49</sub> H <sub>74</sub> O <sub>4</sub>     | 12.7     | [M+H] <sup>+</sup>                  | 727.5660            | 727.5671          | 1.53        | 197.08                         | /                                   | 273.2                                | 273.9                                  | 0.3           | 1.8E-13 |
| Coenzyme Q8                     | C <sub>49</sub> H <sub>74</sub> O <sub>4</sub>     | 12.7     | [M+Na] <sup>+</sup>                 | 749.5479            | 749.5488          | 1.19        | /                              | /                                   | 276.5                                | 277.5                                  | 0.4           | 1.3E-18 |

Abbreviations: Cer, ceramide; DGTS, diacylglycerol-O-4'-(N,N,N-trimethyl) homoserine; FDR, false discovery rate; PC, glycerophosphocholine; PE, glycerophosphoethanolamine; PG, glycerophosphoglycerol; PS, glycerophosphoserines.

Some compounds could not be assigned automatically using the Lipid Annotator software from Agilent because they were not present in the databases or because MS/MS spectra could not be acquired in all-ion fragmentation mode. In such cases, the software cannot carry out any evaluation. These spectra were recorded in targeted MS/MS mode and evaluated manually, which is why no match scores were given.
